# Supplementary material for: Clustering of Health and Oral Health-Compromising Behaviours in Army Personnel in Central Peninsular Malaysia
Source: MDPI journal article supplement (doi:10.3390/healthcare11050640), 2023-02-21
Supplement: s1 [file s1]

**Table S1. Categorisation of healthy and health-compromising behaviours**

| Item                         |                                                     |                        | Category/Response key              |                                                                                  |
|------------------------------|-----------------------------------------------------|------------------------|------------------------------------|----------------------------------------------------------------------------------|
|                              |                                                     |                        | Healthy behaviour                  | Health-compromising behaviour                                                    |
| 1. Medical visit             |                                                     |                        | 12 months or less                  | More than 12 months                                                              |
| 2. Physical activity         | Vigorous activity                                   |                        | 75 minutes or more per week        | Less than 75 minutes per week                                                    |
|                              | Moderate activity                                   |                        | 150 minutes or more per week       | Less than 150 minutes per week                                                   |
|                              | Vigorous + moderate + walking activity              |                        | 600 METs or more per week          | Less than 600 METs per week                                                      |
| 3. Sedentary lifestyle       | Sitting and lying                                   |                        | 8 hours or less per day            | More than 8 hours per day                                                        |
|                              | Screen time                                         |                        | 2 hours or less per day            | More than 2 hours per day                                                        |
| 4. Dietary intake            | Plain water                                         |                        | 6 glasses or more per day          | Less than 6 glasses per day                                                      |
|                              | Fruits and/or vegetables                            | Fruits only            | 2 servings or more per day         | Less than 2 servings per day                                                     |
|                              |                                                     | Vegetables only        | 3 servings or more per day         | Less than 3 servings per day                                                     |
|                              |                                                     | Fruits and vegetables  | 5 servings or more per day         | Less than 5 servings per day                                                     |
|                              | Rice, noodle, bread/cereals, cereal products/tubers |                        | 3 to 5 servings per day            | Less than 3 servings per day<br>More than 5 servings per day                     |
|                              | Milk/dairy products                                 |                        | 2 servings per day                 | Less than 2 servings per day<br>More than 2 servings per day                     |
|                              | Poultry/fish/meat/legumes                           |                        | 3 to 4 servings per day            | Less than 3 servings per day<br>More than 4 servings per day                     |
|                              | Sugary foods/beverages                              |                        | 4 times or less per day            | More than 4 times per day                                                        |
|                              | Carbonated drinks                                   |                        | 3 times or less per day            | More than 3 times per day                                                        |
|                              | Acidic foods                                        |                        |                                    |                                                                                  |
|                              | Fatty foods                                         | Fried food             | Less than 3-4 times/ week          | 3–4 times/week or more                                                           |
|                              |                                                     | Santan-containing food |                                    |                                                                                  |
|                              | Fast food                                           |                        | 1 time or less in the past 7 days  | More than 1 time in the past 7 days                                              |
| 5. Smoking                   | Cigarette/other tobacco product                     |                        | None                               | Current smoker. Smoked cigarette or other tobacco products for the past 30 days. |
|                              | Exposed to cigarette smoke                          |                        | Less than 1 day in the past 7 days | 1 or more days in the past 7 days                                                |
| 6. Alcohol consumption       |                                                     |                        | None                               | Drunk at least one alcoholic drink, one or more days for the past 30 days.       |
| 7. Drug and substances abuse |                                                     |                        | None                               | Any drugs or substance abuse in the past 30 days                                 |
| 8. Aggressive                |                                                     |                        | None                               | Any aggressive involvement in one or more days for the past 30 days.             |

**Table S1 (continued). Categorisation of healthy and health-compromising behaviours**

| Item                      |                                     | Categorised/ Response key                                                                                        |                                                                                                           |
|---------------------------|-------------------------------------|------------------------------------------------------------------------------------------------------------------|-----------------------------------------------------------------------------------------------------------|
|                           |                                     | Healthy behaviour                                                                                                | Health-compromising behaviour                                                                             |
| 9. Sleep                  | Hour                                | Daily sleep hour equivalent to or more than perceived hour to feel fresh and function well.                      | Daily sleep hour less than perceived hour to feel fresh and function well.                                |
|                           | Quality                             | Perceived good and excellent sleep quality.                                                                      | Perceived poor and moderate sleep quality                                                                 |
| 10. Road safety behaviour | Seat belt, helmet, texting, or call | Always wearing seatbelt and helmet, and never text or call while driving or riding a vehicle in the past 7 days. | Not wearing seatbelt and helmet, texting or calling while driving or riding a vehicle in the past 7 days. |
| 11. Toothbrushing         | Frequency                           | Twice a day or more                                                                                              | Less than twice a day                                                                                     |
|                           | Time                                | Brush two or more times and had 'before sleep'.                                                                  | Brushing less than two time or no 'before sleep'                                                          |
| 12. Toothpaste            | Fluoride                            | Use fluoridate toothpaste                                                                                        | Use non-fluoridated toothpaste                                                                            |
|                           | Brand name                          |                                                                                                                  |                                                                                                           |
| 13. Flossing              |                                     | Once every two days or more                                                                                      | Less than once every two days                                                                             |
| 14. Dental visit          | Dental check-up                     | One year or less                                                                                                 | More than one year                                                                                        |
|                           | Last dental visit                   | Dental check-up and preventive treatment in the past 12 months.                                                  | Treatment for an oral health problem and do not visit the dentist in the past 12 months.                  |
| 15. Bruxism               |                                     | No bruxism                                                                                                       | Bruxism                                                                                                   |

**Table S2. Agglomeration schedule of the average linkage between groups**

| <b>Agglomeration Schedule</b> |                  |           |              |                             |           |            |    |
|-------------------------------|------------------|-----------|--------------|-----------------------------|-----------|------------|----|
| Stage                         | Cluster Combined |           | Coefficients | Stage Cluster First Appears |           | Next Stage |    |
|                               | Cluster 1        | Cluster 2 |              | Cluster 1                   | Cluster 2 |            |    |
| 1                             | 14               | 15        | 9.000        | 0                           | 0         |            | 2  |
| 2                             | 12               | 14        | 25.500       | 0                           | 1         |            | 3  |
| 3                             | 12               | 13        | 38.333       | 2                           | 0         |            | 4  |
| 4                             | 3                | 12        | 57.250       | 0                           | 3         |            | 6  |
| 5                             | 30               | 31        | 95.000       | 0                           | 0         |            | 10 |
| 6                             | 3                | 23        | 119.400      | 4                           | 0         |            | 7  |
| 7                             | 2                | 3         | 168.167      | 0                           | 6         |            | 9  |
| 8                             | 32               | 33        | 224.000      | 0                           | 0         |            | 38 |
| 9                             | 2                | 37        | 245.714      | 7                           | 0         |            | 10 |
| 10                            | 2                | 30        | 304.500      | 9                           | 5         |            | 12 |
| 11                            | 28               | 29        | 309.000      | 0                           | 0         |            | 21 |
| 12                            | 2                | 34        | 353.500      | 10                          | 0         |            | 13 |
| 13                            | 2                | 35        | 403.364      | 12                          | 0         |            | 14 |
| 14                            | 2                | 22        | 436.417      | 13                          | 0         |            | 21 |
| 15                            | 8                | 9         | 488.000      | 0                           | 0         |            | 18 |
| 16                            | 40               | 41        | 502.000      | 0                           | 0         |            | 28 |
| 17                            | 19               | 21        | 525.000      | 0                           | 0         |            | 24 |
| 18                            | 8                | 11        | 552.000      | 15                          | 0         |            | 27 |
| 19                            | 4                | 5         | 568.000      | 0                           | 0         |            | 33 |
| 20                            | 24               | 25        | 584.000      | 0                           | 0         |            | 32 |
| 21                            | 2                | 28        | 598.423      | 14                          | 11        |            | 23 |
| 22                            | 16               | 17        | 605.000      | 0                           | 0         |            | 26 |
| 23                            | 2                | 27        | 680.467      | 21                          | 0         |            | 25 |
| 24                            | 19               | 20        | 744.500      | 17                          | 0         |            | 39 |
| 25                            | 2                | 42        | 765.563      | 23                          | 0         |            | 28 |
| 26                            | 16               | 18        | 776.500      | 22                          | 0         |            | 29 |
| 27                            | 8                | 10        | 796.667      | 18                          | 0         |            | 34 |
| 28                            | 2                | 40        | 811.412      | 25                          | 16        |            | 29 |
| 29                            | 2                | 16        | 829.947      | 28                          | 26        |            | 31 |
| 30                            | 1                | 39        | 845.000      | 0                           | 0         |            | 35 |
| 31                            | 2                | 36        | 884.045      | 29                          | 0         |            | 33 |
| 32                            | 24               | 26        | 886.000      | 20                          | 0         |            | 37 |
| 33                            | 2                | 4         | 1001.348     | 31                          | 19        |            | 35 |
| 34                            | 7                | 8         | 1015.000     | 0                           | 27        |            | 36 |
| 35                            | 1                | 2         | 1043.580     | 30                          | 33        |            | 37 |
| 36                            | 7                | 38        | 1056.600     | 34                          | 0         |            | 39 |
| 37                            | 1                | 24        | 1065.741     | 35                          | 32        |            | 41 |
| 38                            | 6                | 32        | 1072.000     | 0                           | 8         |            | 40 |
| 39                            | 7                | 19        | 1111.944     | 36                          | 24        |            | 40 |
| 40                            | 6                | 7         | 1139.741     | 38                          | 39        |            | 41 |
| 41                            | 1                | 6         | 1399.217     | 37                          | 40        |            | 0  |

**Table S3. K-means cluster analysis: Number of respondents and the final cluster centre of the health and oral health-compromising behaviours (N=2435)**

| K-means cluster analysis                        | Cluster |      |                      |      |
|-------------------------------------------------|---------|------|----------------------|------|
|                                                 | 1       |      | 2                    |      |
|                                                 | n       | %    | n                    | %    |
| Number of respondents (n)                       | 1224    | 50.3 | 1211                 | 49.7 |
| Final Cluster Centers                           |         |      |                      |      |
| Health and oral health-compromising behaviours  | Mean    |      | p-value <sup>1</sup> |      |
| Infrequent medical screening                    | 1       | 0    | <0.001*              |      |
| High screen-time (work)                         | 1       | 0    | <0.001*              |      |
| High screen-time (personal)                     | 1       | 0    | <0.001*              |      |
| Low fruit                                       | 1       | 0    | <0.001*              |      |
| High fried food                                 | 1       | 0    | <0.001*              |      |
| Inadequate sleep (work day)                     | 1       | 0    | <0.001*              |      |
| Infrequent/never floss                          | 1       | 0    | <0.001*              |      |
| Infrequent dental check-up                      | 1       | 0    | <0.001*              |      |
| Symptomatic dental visit (self-initiative)      | 1       | 0    | <0.001*              |      |
| Physical inactivity                             | 0       | 0    | 0.242                |      |
| High sitting and lying down                     | 0       | 0    | <0.001*              |      |
| High sweet food                                 | 0       | 0    | 0.578                |      |
| High sweet drink                                | 0       | 0    | 0.284                |      |
| High carbonated drink                           | 0       | 0    | 0.102                |      |
| High acidic food                                | 0       | 0    | 0.21                 |      |
| High <i>santan</i> -containing food             | 0       | 0    | <0.001*              |      |
| High fast food                                  | 0       | 0    | 0.001*               |      |
| Smoking (other tobacco products)                | 0       | 0    | 0.343                |      |
| Alcohol                                         | 0       | 0    | <0.001*              |      |
| Drug                                            | 0       | 0    | 0.001*               |      |
| Inadequate sleep (holiday)                      | 0       | 0    | <0.001*              |      |
| Sleep substandard quality                       | 0       | 0    | <0.001*              |      |
| Aggressive behaviours                           | 0       | 0    | <0.001*              |      |
| Not wearing seat belt (driver)                  | 0       | 0    | <0.001*              |      |
| Not wearing seat belt (passenger)               | 0       | 0    | <0.001*              |      |
| Not wear helmet (rider)                         | 0       | 0    | 0.988                |      |
| Not wear helmet (passenger)                     | 0       | 0    | 0.878                |      |
| Infrequent toothbrushing (frequency)            | 0       | 0    | 0.045*               |      |
| Unrecommended toothbrushing (occasion)          | 0       | 0    | <0.001*              |      |
| Non-fluoridated toothpaste (self-report)        | 0       | 0    | 0.442                |      |
| Non-fluoridated toothpaste (recheck brand)      | 0       | 0    | 0.376                |      |
| Symptomatic dental visit (military requirement) | 0       | 0    | <0.001*              |      |
| Bruxism                                         | 0       | 0    | <0.001*              |      |
| Low plain water                                 | 0       | 1    | 0.002*               |      |
| Low vegetable                                   | 1       | 1    | <0.001*              |      |
| Unrecommended rice/noodle/bread/cereal/tuber    | 1       | 1    | 0.049*               |      |
| Unrecommended milk/dairy products               | 1       | 1    | <0.001*              |      |
| Unrecommended poultry/fish/meat/egg/legume      | 1       | 1    | 0.024*               |      |
| Smoking (cigarette)                             | 1       | 1    | 0.104                |      |
| Smoke (exposed)                                 | 1       | 1    | <0.001*              |      |
| Texting while driving                           | 1       | 1    | <0.001*              |      |
| Calling while driving                           | 1       | 1    | 0.048*               |      |

<sup>1</sup>*p-value*: (ANOVA): The F tests should be used only for descriptive purposes because the clusters have been chosen to maximise the differences among cases in different clusters. The observed significance levels are not corrected for this and thus cannot be interpreted as tests of the hypothesis that the cluster means are equal.

\*Significant at  $p < 0.050$ .
